# Supplementary material for: Large Yellow Tea Extract Ameliorates Metabolic Syndrome by Suppressing Lipogenesis through SIRT6/SREBP1 Pathway and Modulating Microbiota in Leptin Receptor Knockout Rats
Source: MDPI journal article supplement (doi:10.3390/foods11111638), 2022-06-01

Supplementary Materials  
Figure S1

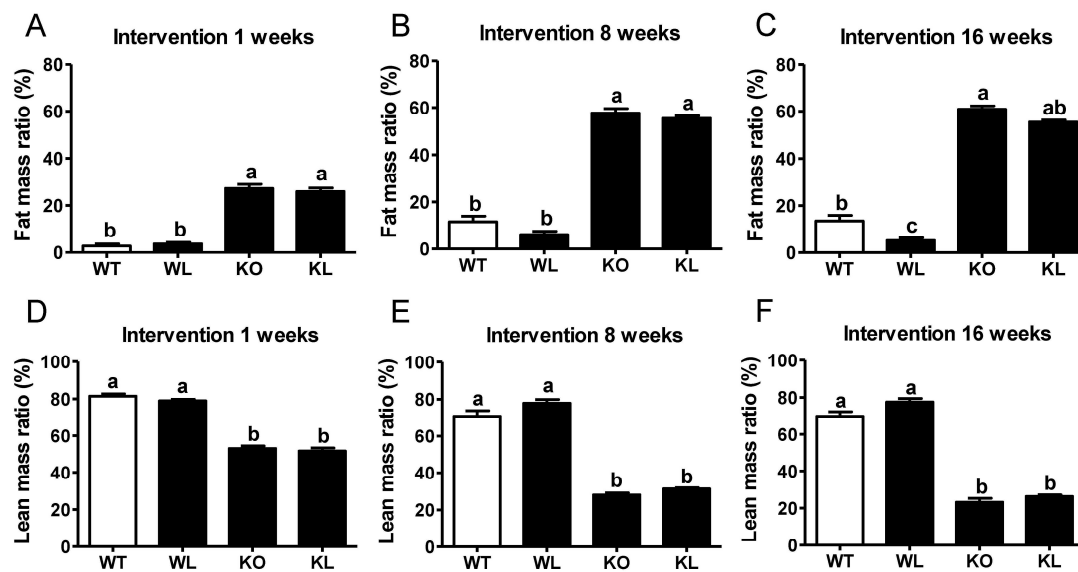

**Figure S1. Effects of LWE on fat mass ratio and lean mass ratio in each group rats.** Data are expressed as mean  $\pm$  SEM (n = 4-6). Means with different letters are significantly different ( $p < 0.05$ ).

**Figure S2**

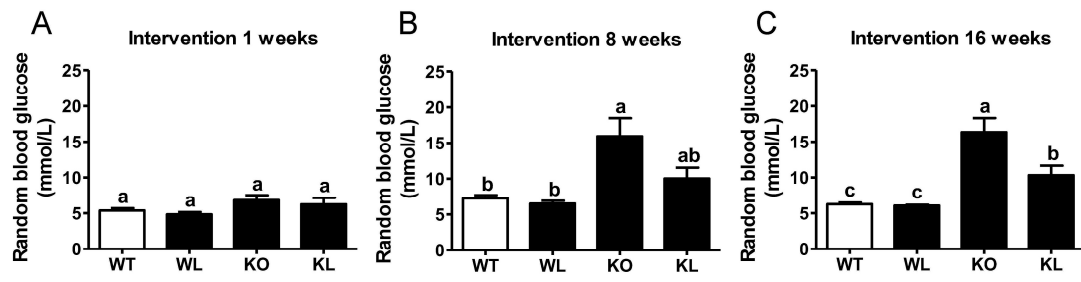

**Figure S2. Effects of LWE on random blood glucose level in each group rats.** Data are expressed as mean  $\pm$  SEM ( $n = 4-6$ ). Means with different letters are significantly different ( $p < 0.05$ ).

**Figure S3**

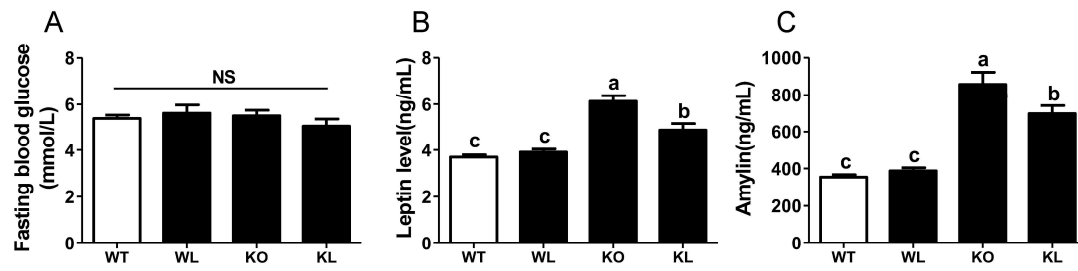

**Figure S3. Effects of LW on fasting serum glucose, leptin and amylin level in each group.** (A) Fasting serum glucose, (B) amylin level and (C) leptin level and was measured, respectively. Data are expressed as mean  $\pm$  SEM (n = 4-6). Means with different letters are significantly different ( $p < 0.05$ ).

**Figure S4**

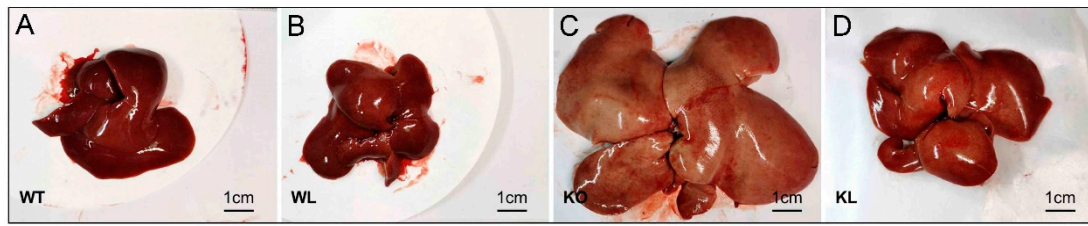

**Figure S4. The liver images of different groups of rats.**

Figure S5

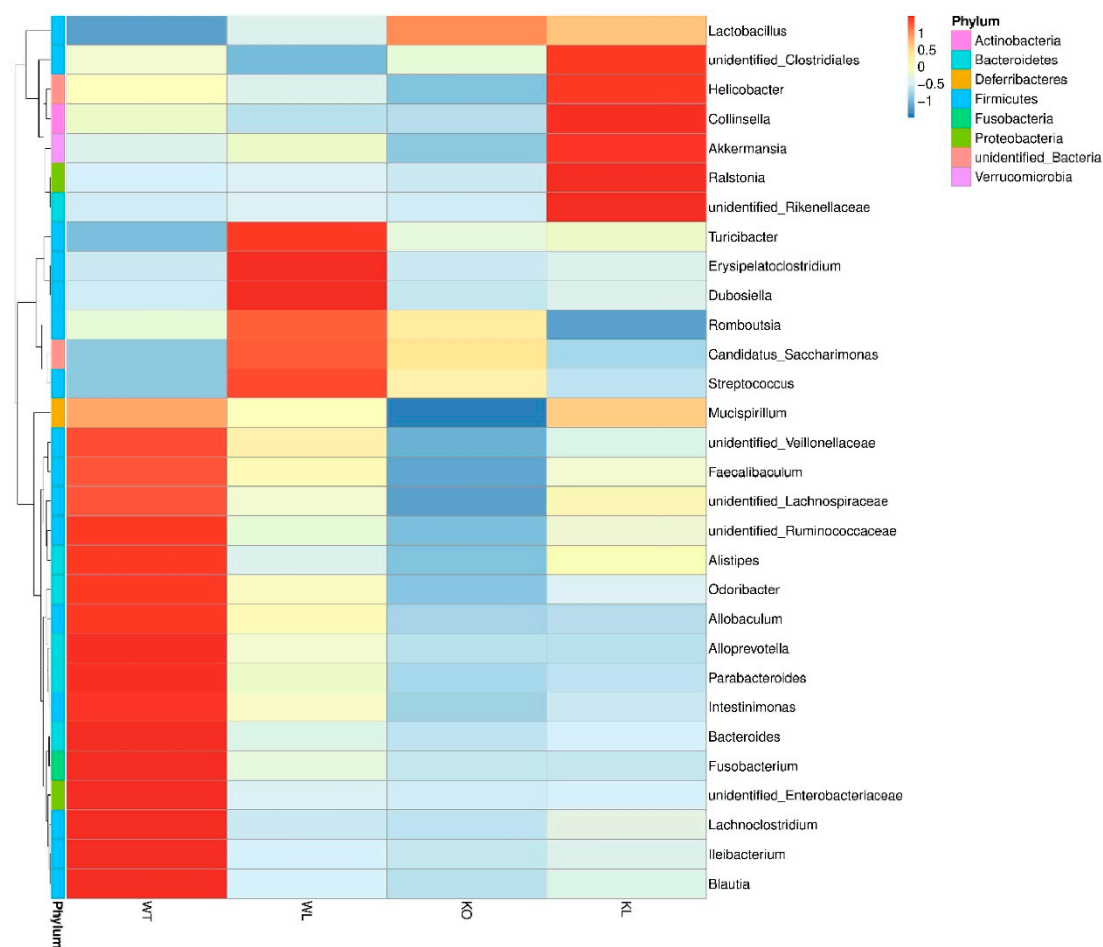

Figure S5. The heatmap of gut microbiota at genus level in different group rats.

**Figure S6**

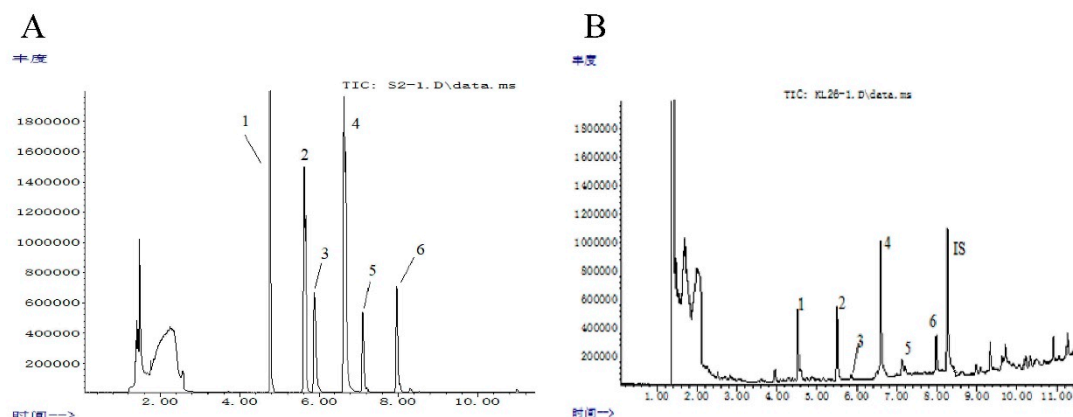

**Figure S6. Total ion current (TIC) chromatograms of short chain fatty acids in rat feces. (A)** total ion current (TIC) chromatograms of standards of short chain fatty acids. **(B)** total ion current (TIC) chromatograms of tested sample of rat feces. The marker in the figure represents 1 acetic acid, 2 propanoic acid, 3 isobutyric acid, 4 butyric acid, 5 isopentanoic acid, 6 pentanoic acid, IS 2-ethylbutyric acid.

**Table S1.** Compositions of experimental diets

| <b>Ingredient (g)</b> | <b>Content percentage</b> |
|-----------------------|---------------------------|
| Casein                | 191                       |
| Cornstarch            | 484                       |
| Dextrin               | 120                       |
| Sucrose               | 66                        |
| Soybean oil           | 24                        |
| Lard                  | 19                        |
| Cellulose             | 48                        |
| Mineral mix           | 33                        |
| Vitamin mix           | 10                        |
| L-Cystine             | 3                         |
| Line bitartrate       | 2                         |
| TBHQ                  | 0.01                      |
| Total                 | 1000                      |
| <b>Total energy</b>   |                           |
| Protein, %            | 20.6                      |
| Fat, %                | 12.0                      |
| Carbohydrate, %       | 67.4                      |
| Energy, Kcal/g        | 3.616                     |

**Table S2.** Primer sequences used for real-time PCR gene expression experiment

| Gene                           | Primer sequences         |                           |
|--------------------------------|--------------------------|---------------------------|
|                                | Forward (5'-3')          | Reverse (5'-3')           |
| <i>SREBF1</i>                  | TCTCCTGGAGCGAGCATTGA     | CAGTGGTGGTAGCCATGCTG      |
| <i>PPAR<math>\gamma</math></i> | GAAAGACAACAGACAAATCACCAT | CAGCTTCCACGGATCGAAACTG    |
| <i>ACC<math>\alpha</math></i>  | GGAAGTGGAAGGCACAGTGAAGG  | CTGCGGATCTGCTTGAGGACATAG  |
| <i>FAS</i>                     | GTTGCTGCTGCTGTGGACCTC    | AGGATCACATTGCCGTGGTACTTG  |
| <i>DGAT1</i>                   | GCCTTACTGGTTGAGTCTATCAC  | GCACCACAGATTGACATCC       |
| <i>HMGCR</i>                   | CCAAACCCAGTAACCCAAAG     | GGTAAAACTGCCAGAGAGAAACACT |
| <i>SIRT6</i>                   | CGTGGATGAGGTGATGTG       | GGCTTATAGGAACCATTGAGA     |
| <i>18S</i>                     | GGGTCGGGAGTGGGTAATTT     | AGAAACGGCTACCACATCCAA     |

The original unprocessed images for western blot and the target panels were marked in red arrow

Figure 6A

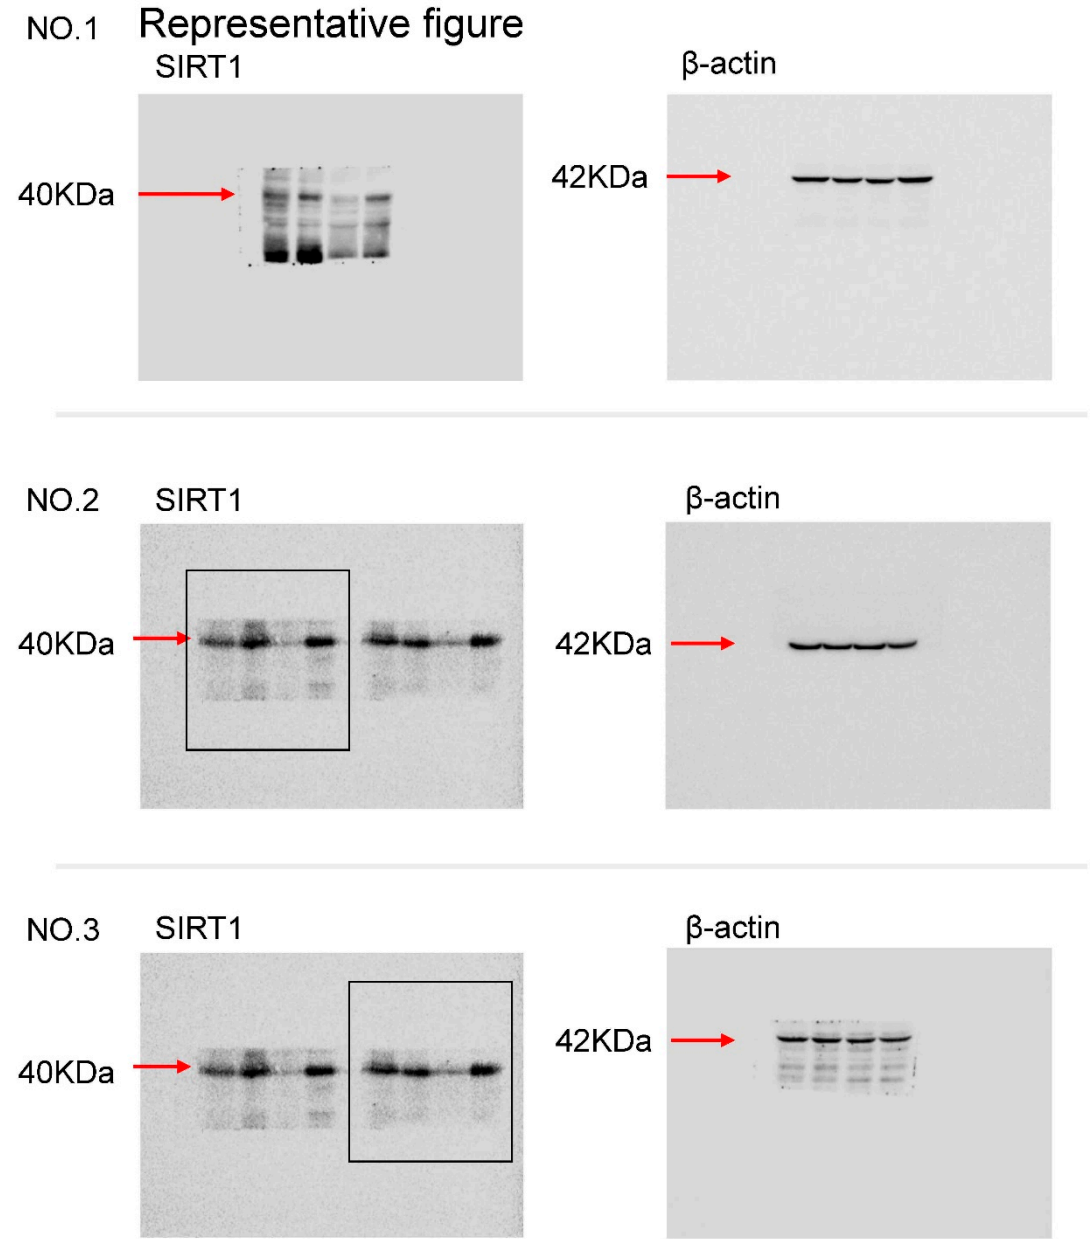

Figure 6B

NO.1 Representative figure

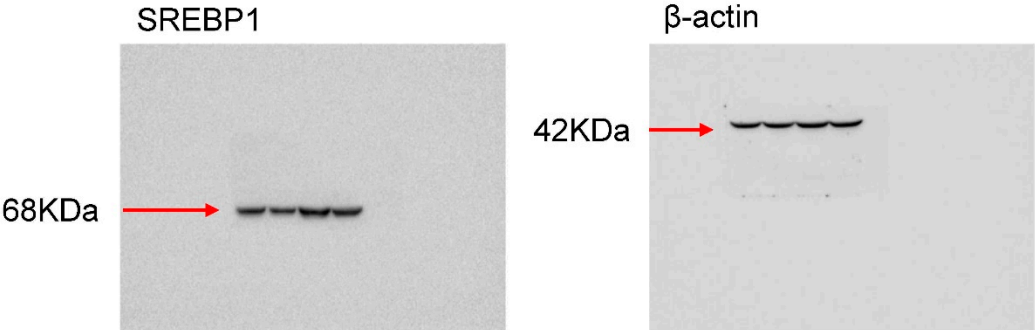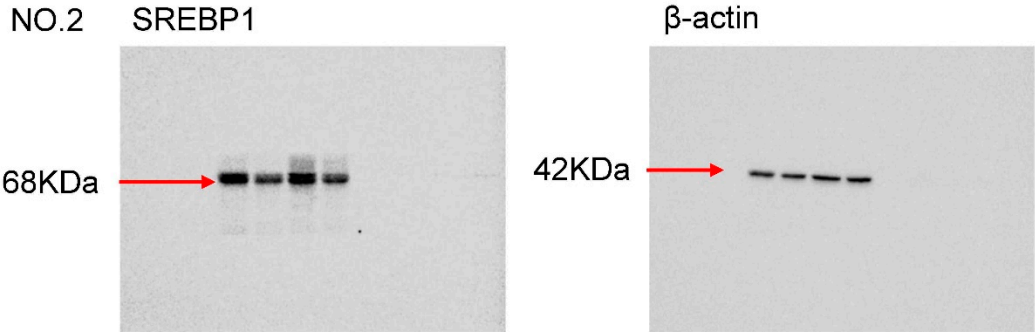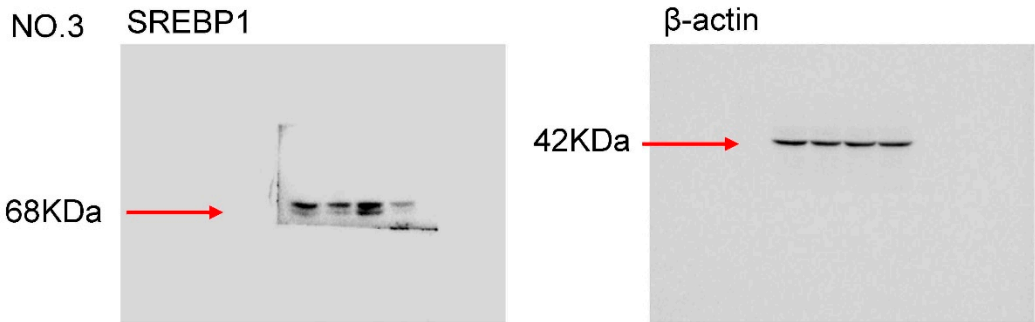

Figure 6C

NO.1 Representative figure

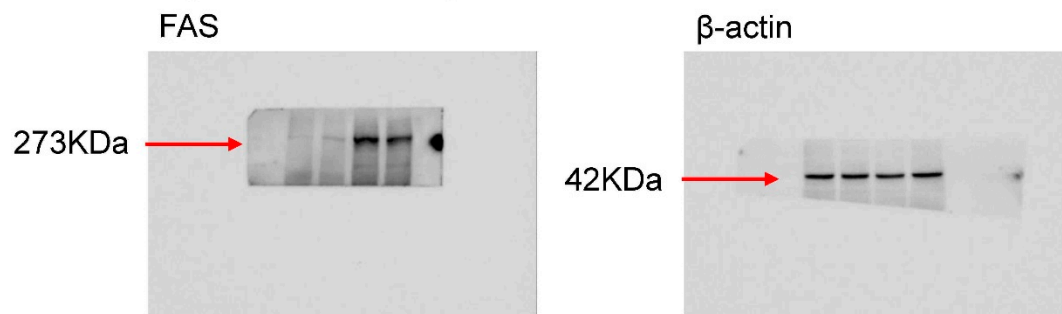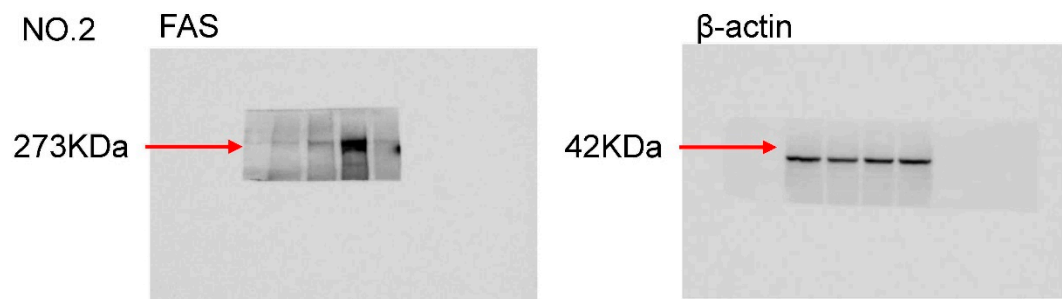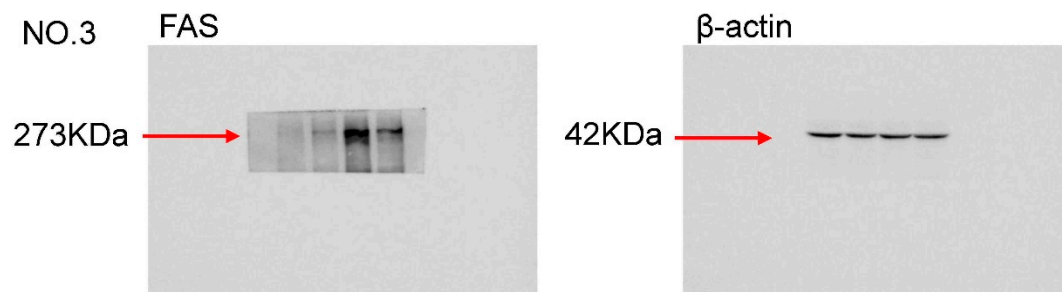

Figure 6D

NO.1    **Representative figure**  
          **DGAT1**

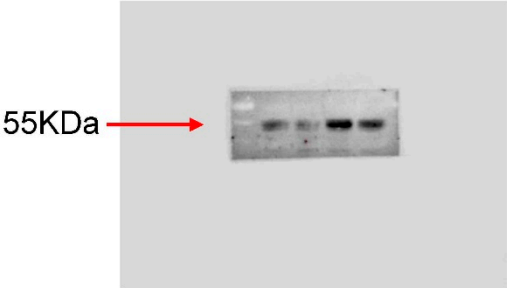

**β-actin**

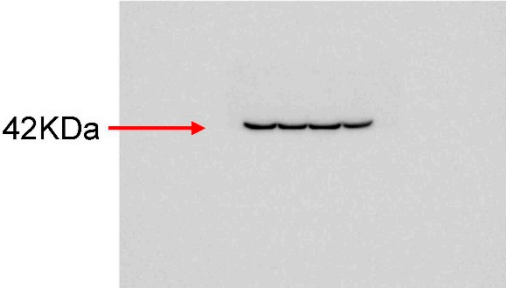

NO.2    **DGAT1**

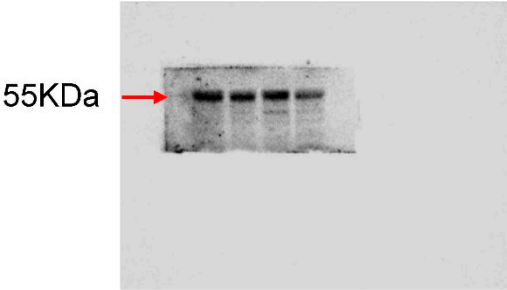

**β-actin**

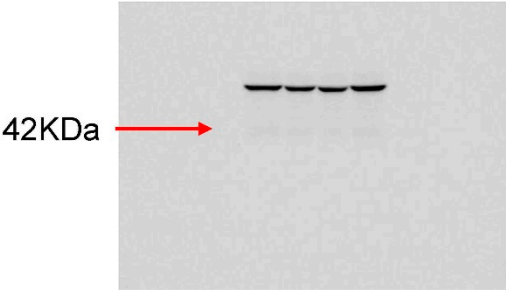

NO.3    **DGAT1**

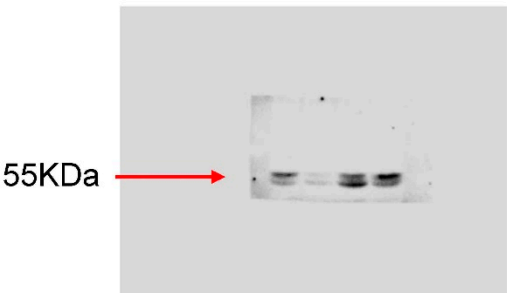

**β-actin**

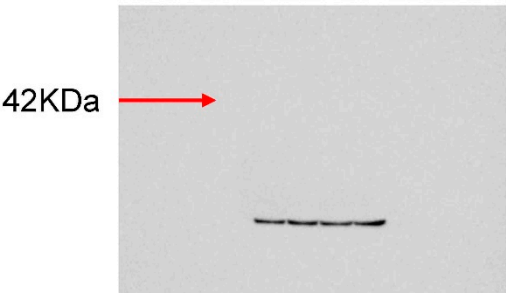

NO.4    **DGAT1**

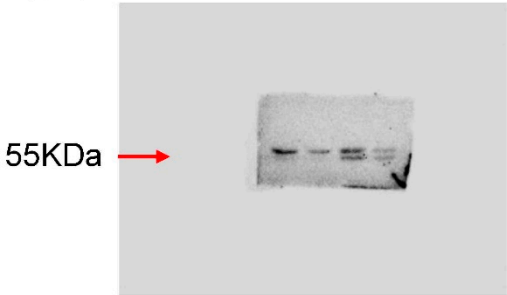

**β-actin**

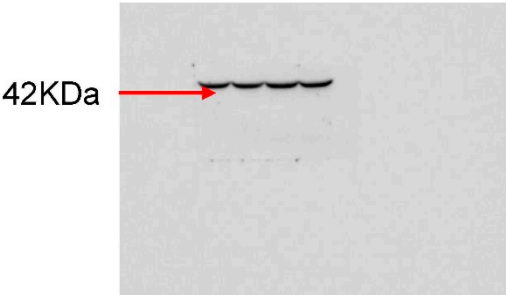

Supplement: s1 [file s1]
